# Supplementary material
Source: publisher figshare collection journal article supplement (https://karger.figshare.com/ndownloader/files/25746605)
Supplement: Supplementary file 1 [file 25746605]

**Supplementary Video Legend**

Supplementary Video. Hysteroscopic treatment and 6-months follow-up of the case #4 by using the 3.5-mm Versascope hysteroscope (Gynecare Ethicon, Inc.) and a twizzle electrode with bipolar electrical energy system, VersaPoint 2 (Gynecare Ethicon, Inc.).

The Supplementary Video is available at one of the following links:

https://www.dropbox.com/s/npps0eq2yptspii/Supplementary%20video..mp4?dl=0

https://drive.google.com/open?id=1mwCrAZZ7nKBmJm7WLup7zj5KmdIAt45J
